# Supplementary material
Source: publisher figshare collection journal article supplement (https://tandf.figshare.com/articles/dataset/_/12100701)
Supplement: Supplementary file 2 [file 2]

```
##### Simulation 1 #####
```

```
setwd("~/research/Rcodes")
library(foreach)
library(doParallel)
library(doRNG)
```

```
cl=makeCluster(24, outfile="")
registerDoParallel(cl)
```

```
library(MASS)
library(Matrix)
library(glmnet)
library(compositions)
```

```
library(scout)
library(softImpute)
library(grplasso)
library(robustbase)
```

```
source('pQIFmp_scad25_par.R')
source('imputeglm.predict.R')
source("mySCAD5.R")
source('DISCOM.R')
```

```
n=700          ##### Only changed here compared to Sim133.R
n1=30
n2=220
n3=220
n4=230
p=40
q=14          ##### 4+4+4+2
n_pat=4
Im=10
Im2=13
```

```
p1=12
p2=12
p3=12
p4=4
```

```
nalpaha=10
nlambdha=15
alpaha.all=10^seq(0,-3,length=nalpaha)
lambdha.all=10^(seq(log10(2),-3,length=nlambdha))
```

```
n.tun=10          ### tuning dataset
```

```
a=c(0.1, 0.2, 0.3, 0.4, 0.5, 0.6, 0.7, 0.8, 0.9)
beta=c(0.8, 1, 1.5, 2, 2.5, 3, 3.5, 4, 5, 6, 7, 8, 9, 10)
```

```

index2=matrix(TRUE,p,Im)                # take which derivative in
estimating equations
index2[25:36,2]=FALSE
index2[13:36,3]=FALSE
index2[c(1:12,25:36),4]=FALSE
index2[13:24,5]=FALSE
index2[13:36,6]=FALSE
index2[1:24,7]=FALSE
index2[1:12,8]=FALSE
index2[c(1:12,25:36),9]=FALSE
index2[1:24,10]=FALSE

impest=rep(0,9)

missid=matrix(0,3,12)
missid[1,]=c(1:12)
missid[2,]=c(13:24)
missid[3,]=25:36

T=50
nmethod=14

table_b=matrix(0,45,(4+6*nmethod+Im-2))

result_b= array(0, c(T, nmethod*(p+2)+Im-1, 11, 9))
set.seed(1)
seed_each=sample.int(5000000, 100000)
seed_count=1
count=1
IX= array(TRUE, dim=c(T, 11, 9))
for (s1 in 4:8) {
  for (b in c(11,9,7,5)) {

    signal=matrix(0,p,p)
    signal[1:p,1:p]=diag(1-a[s1],p,p)+matrix(a[s1],p,p)

    true=c(beta[b]*rep(1,4), rep(0,8), beta[b+1]*rep(1,4),
rep(0,8),beta[b+2]*rep(1,4), rep(0,8), beta[b+3]*rep(1,2), rep(0,2))
    signal_id=c(1:4,13:16,25:28,37:38)

    start.time = proc.time()
    ii=1
    while (ii<=T) {
      set.seed(seed_each[seed_count])
      x00=mvrnorm(n,rep(0,p),signal)                ## original data
      x=x00
      noise=rnorm(n,0,1)

      y=noise+beta[b]*apply(x[,1:4],1,sum)+beta[b+1]*apply(x[,13:16],1,sum)+
      beta[b+2]*apply(x[,25:28],1,sum)+beta[b+3]*apply(x[,37:38],1,sum)

```

```

prob0=exp(-10*apply(x[,37:40],1,sum))
if (sum(prob0==Inf)>0){
  prob0[prob0==Inf]=max(prob0[!prob0==Inf])
}
group1=sample.int(n,n1, prob = prob0)
group2=sample.int(n-n1,n2)
group3=sample.int(n-n1-n2,n3)

x1=x
for (k1 in 1:n) {
  if (sum((1:n)[-group1][group2]==k1)>0) {
    x1[k1,25:36]=NA
  } else if (sum((1:n)[-group1][-group2][group3]==k1)>0) {
    x1[k1,13:24]=NA
  } else if (sum((1:n)[-group1][-group2][-group3]==k1)>0) {
    x1[k1,1:12]=NA
  }
}

x4=na.omit(x1)
y4=y[apply(is.na(x1),1,sum)==0]

x0=x
x2=x1
centerx=rep(0,p)
scalex=rep(1,p)
centery=mean(y)
y2=y-centery
for (j in 1:p) {
  centerx[j]=mean(x1[,j], na.rm=TRUE)
  scalex[j]=sd(x1[,j], na.rm = TRUE)
  x2[,j]=(x1[,j]-centerx[j])/scalex[j]
  x0[,j]=(x[,j]-centerx[j])/scalex[j]
}

miss=is.na(x2)
miss_num=apply(miss,1,function(x) unbinary(paste(as.numeric(x),
collapse="")))
x5=x2[order(miss_num),]
x6=x1[order(miss_num),] ##### Don't standardize for
DISCOM

bi_miss=is.na(x5)[,c(1,13,25)]
id=apply(bi_miss,1,function(x) unbinary(paste(as.numeric(x),
collapse="")))
n_pat=length(unique(id))
pat_start=rep(1,n_pat)
table_pat=table(id)
count_tmp=1
for (l in 2:n_pat){
  count_tmp=count_tmp+table_pat[l-1]
  pat_start[l]=count_tmp
}

```

```

}

y5=y2[order(miss_num)]
x.ori=x0[order(miss_num),]

x3=array(0,dim=c(n,p,Im))
y3=matrix(0,n,Im)
index1=matrix(FALSE,n,Im) # use which sample
index1[1:(pat_start[2]-1),1]=TRUE
pat=rep(0,Im)
for (j in 1:Im) {
  y3[,j]=y5
  if (j==1) {
    x3[pat_start[1]:(pat_start[2]-
1),,j]=x5[pat_start[1]:(pat_start[2]-1),]
    pat[j]=1
  }
  if (j==2|j==3|j==4) {
    x3[pat_start[2]:(pat_start[3]-
1),,j]=x5[pat_start[2]:(pat_start[3]-1),]
    index1[pat_start[2]:(pat_start[3]-1),j]=TRUE
    pat[j]=2
  } else if (j==5|j==6|j==7) {
    x3[pat_start[3]:(pat_start[4]-
1),,j]=x5[pat_start[3]:(pat_start[4]-1),]
    index1[pat_start[3]:(pat_start[4]-1),j]=TRUE
    pat[j]=3
  } else if (j==8|j==9|j==10) {
    x3[pat_start[4]:n,,j]=x5[pat_start[4]:n,]
    index1[pat_start[4]:n,j]=TRUE
    pat[j]=4
  }
}

miss2=is.na(x5)
PCA_m=rep(0,Im)
PCA_m[1]=1
for (k in 2:Im) {
  if (k==2|k==5|k==8) {
    miss_tmp=is.na(x3[which.max(index1[,k]),,k])
    ind_y=(1:p)[miss_tmp]
    ind_tmp=ind_y
    x3[index1[,k]==TRUE,ind_y,k]=imputeglm.predict(X=x5,
ind_y=ind_y, miss=miss2, newdata = x3[index1[,k]==TRUE,-
ind_tmp,k])$PRED
    PCA_m[k]=1
  } else if (k==3|k==6) {
    miss_tmp=is.na(x3[which.max(index1[,k]),,k])
    ind_y=(1:p)[miss_tmp]
    ind_tmp=13:36
    x3[index1[,k]==TRUE,ind_y,k]=imputeglm.predict(X=x5,
ind_y=ind_y, ind_x = c(1:12,37:40), miss=miss2, newdata =
x3[index1[,k]==TRUE,-ind_tmp,k])$PRED

```

```

        PCA_m[k]=2
    } else if (k==4|k==9) {
        miss_tmp=is.na(x3[which.max(index1[,k]),,k])
        ind_y=(1:p)[miss_tmp]
        ind_tmp=c(1:12,25:36)
        x3[index1[,k]==TRUE,ind_y,k]=imputeglm.predict(X=x5,
ind_y=ind_y, ind_x = c(13:24,37:40), miss=miss2, newdata =
x3[index1[,k]==TRUE,-ind_tmp,k])$PRED
        PCA_m[k]=2
    } else if (k==7|k==10) {
        miss_tmp=is.na(x3[which.max(index1[,k]),,k])
        ind_y=(1:p)[miss_tmp]
        ind_tmp=1:24
        x3[index1[,k]==TRUE,ind_y,k]=imputeglm.predict(X=x5,
ind_y=ind_y, ind_x = c(25:36,37:40), miss=miss2, newdata =
x3[index1[,k]==TRUE,-ind_tmp,k])$PRED
        PCA_m[k]=2
    }
}

impest[1]=mean((x3[pat_start[2]:(pat_start[3]-1),
miss2[pat_start[2],, 2]-x.ori[pat_start[2]:(pat_start[3]-1),
miss2[pat_start[2],,]])^2)
impest[2]=mean((x3[pat_start[3]:(pat_start[4]-1),
miss2[pat_start[3],, 5]-x.ori[pat_start[3]:(pat_start[4]-1),
miss2[pat_start[3],,]])^2)
impest[3]=mean((x3[pat_start[4]:n, miss2[pat_start[4],, 8]-
x.ori[pat_start[4]:n, miss2[pat_start[4],,]])^2)
impest[4]=mean((x3[pat_start[2]:(pat_start[3]-1),
miss2[pat_start[2],, 3]-x.ori[pat_start[2]:(pat_start[3]-1),
miss2[pat_start[2],,]])^2)
impest[5]=mean((x3[pat_start[3]:(pat_start[4]-1),
miss2[pat_start[3],, 6]-x.ori[pat_start[3]:(pat_start[4]-1),
miss2[pat_start[3],,]])^2)
impest[6]=mean((x3[pat_start[4]:n, miss2[pat_start[4],, 9]-
x.ori[pat_start[4]:n, miss2[pat_start[4],,]])^2)
impest[7]=mean((x3[pat_start[2]:(pat_start[3]-1),
miss2[pat_start[2],, 4]-x.ori[pat_start[2]:(pat_start[3]-1),
miss2[pat_start[2],,]])^2)
impest[8]=mean((x3[pat_start[3]:(pat_start[4]-1),
miss2[pat_start[3],, 7]-x.ori[pat_start[3]:(pat_start[4]-1),
miss2[pat_start[3],,]])^2)
impest[9]=mean((x3[pat_start[4]:n, miss2[pat_start[4],, 10]-
x.ori[pat_start[4]:n, miss2[pat_start[4],,]])^2)

x5[pat_start[2]:(pat_start[3]-
1),]=x3[pat_start[2]:(pat_start[3]-1),,2]
x5[pat_start[3]:(pat_start[4]-
1),]=x3[pat_start[3]:(pat_start[4]-1),,5]
x5[pat_start[4]:n,]=x3[pat_start[4]:n,,8]

```

```

    modell=pQIFmp1(X=x3, y=y3, index1=index1, index2=index2, nlam =
15, index0 = c(1,2,5,8), missid=missid, eps2 = 1e-3, max.iter = 5000,
centerx=centerx, scalex=scalex, centery=centery, lambda.min =
0.000001, pat=pat, PCA_m = PCA_m, h1=2^(-(8:20)))
    thetal=modell$beta
    bic1=modell$bic ##### changed from biq to bic
    best1=which.min(bic1[bic1!=0])
    tmp1=thetal[best1,]
    notcon1=modell$notcon
    if (length(best1)==0) {
        best1=NA
    }
    if (length(tmp1)==0) {
        tmp1=rep(NA,p)
    }

    bic2=modell$bic1 ##### changed from biq to bic
    best2=which.min(bic2[bic2!=0])
    tmp2=thetal[best2,]
    notcon2=modell$notcon
    if (length(best2)==0) {
        best2=NA
    }
    if (length(tmp2)==0) {
        tmp2=rep(NA,p)
    }

    bic5=modell$ebic1 ##### changed from biq to bic
    best5=which.min(bic5[bic5!=0])
    tmp5=thetal[best5,]
    notcon5=modell$notcon
    if (length(best5)==0) {
        best5=NA
    }
    if (length(tmp5)==0) {
        tmp5=rep(NA,p)
    }

    bic6=modell$ebic11 ##### changed from biq to bic
    best6=which.min(bic6[bic6!=0])
    tmp6=thetal[best6,]
    notcon6=modell$notcon
    if (length(best6)==0) {
        best6=NA
    }
    if (length(tmp6)==0) {
        tmp6=rep(NA,p)
    }

    bic9=modell$ebicM ##### changed from biq to bic
    best9=which.min(bic9[bic9!=0])
    tmp9=thetal[best9,]

```

```

notcon9=model1$notcon
if (length(best9)==0) {
  best9=NA
}
if (length(tmp9)==0) {
  tmp9=rep(NA,p)
}

bic10=model1$ebicM1 ##### changed from big to bic
best10=which.min(bic10[bic10!=0])
tmp10=theta1[best10,]
notcon10=model1$notcon
if (length(best10)==0) {
  best10=NA
}
if (length(tmp10)==0) {
  tmp10=rep(NA,p)
}

15) model3=mySCAD(x4, y4, standardize=TRUE, max.iter = 5000, nlam =

theta3=model3$beta
bic3=model3$bic
best3=which.min(bic3)
tmp3=theta3[best3,]
notcon3=model3$notcon

bic7=model3$ebic1
best7=which.min(bic7)
tmp7=theta3[best7,]
notcon7=model3$notcon

bic11=model3$ebicM
best11=which.min(bic11)
tmp11=theta3[best11,]
notcon11=model3$notcon

15) object4=mySCAD(x5, y5, standardize=TRUE, max.iter = 5000, nlam =

theta4=object4$beta
bic4=object4$bic
best4=which.min(bic4)
tmp4=theta4[best4,]/scalex
notcon4=object4$notcon

bic8=object4$ebic1
best8=which.min(bic8)
tmp8=theta4[best8,]/scalex
notcon8=object4$notcon

bic12=object4$ebicM
best12=which.min(bic12)

```

```

tmp12=theta4[best12,]/scalex
notcon12=object4$notcon

## DISCOM
X.all=x6[(n.tun+1):n,]
Y=y5[(n.tun+1):n]
X.tun=x6[1:n.tun,]
Y.tun=y5[1:n.tun]

DISCOM.tun.error=array(NA,dim=c(nalpha,nalpha,nlambda))

for(code in 1:2)
{
  if(code==1){
    xtx.raw=compute.xtx(X.all)
    xty=compute.xty(X.all,Y)
  }
  else{
    xtx.raw=compute.xtx(X.all,1,1)
    xty=compute.xty(X.all,Y,1,1)
  }

  xtx.raw.I=as.matrix(bdiag(xtx.raw[1:p1,1:p1],xtx.raw[(p1+1):(p1+p2),(p1+1):(p1+p2)],
  xtx.raw[(p1+p2+1):(p1+p2+p3),(p1+p2+1):(p1+p2+p3)],
  xtx.raw[(p1+p2+p3+1):(p1+p2+p3+p4),(p1+p2+p3+1):(p1+p2+p3+p4)]))
  xtx.raw.C=xtx.raw-xtx.raw.I
  shrink.target=sum(diag(xtx.raw))/p

  for(i in 1:nalpha){
    for(j in 1:nalpha){
      alpha1=alpha.all[i]
      alpha2=alpha.all[j]
      xtx=alpha1*xtx.raw.I+alpha2*xtx.raw.C+(1-
alpha1)*shrink.target*diag(p)
      if(min(eigen(xtx)$values)<0){
        DISCOM.tun.error[i,j,]=10^8
      } else{
        beta.initial=rep(0,p)
        for(k in 1:nlambda){
          beta.cov=as.vector(crossProdLasso(xtx,xty,lambda.all[k],beta.init=beta
.initial)$beta)
          betal.initial=beta.cov

          DISCOM.tun.values=as.vector(as.matrix(X.tun)%*%beta.cov)
          DISCOM.tun.error[i,j,k]=mean((Y.tun-
DISCOM.tun.values)^2)
        }
      }
    }
  }
}

```



```

    }
  }
}

opt.index=as.vector(which(DISCOM.tun.error==min(DISCOM.tun.error),arr.
ind=T)[1,])
  opt.alpha1=alpha.all[opt.index[1]]
  opt.alpha2=alpha.all[opt.index[2]]
  opt.lambda=lambda.all[opt.index[3]]
  xtx=opt.alpha1*xtx.raw.I+opt.alpha2*xtx.raw.C+(1-
opt.alpha1)*shrink.target*diag(p)
  beta.cov=as.vector(crossProdLasso(xtx, xty, opt.lambda)$beta)

  if(code==1){
    tmp13=beta.cov/scalex
    best13=opt.lambda
    notcon13=0
  } else{
    tmp14=beta.cov/scalex
    best14=opt.lambda
    notcon14=0
  }
}

for (j in 1:nmethod) {
  result_b[ii, ((j-1)*(p+2)+1):((j-1)*(p+2)+p), b,
s1]=get(paste('tmp',j, sep = ''))
  result_b[ii, (j-1)*(p+2)+p+1, b, s1]=get(paste('notcon',j, sep
= ''))
  result_b[ii, (j-1)*(p+2)+p+2, b, s1]=get(paste('best',j, sep =
''))
}
result_b[ii, (nmethod*(p+2)+1):(nmethod*(p+2)+Im-1), b,
s1]=impest

  save.image("~/research/Sim_pQIF_simple_est136.RData")
  ii=ii+1
  seed_count=seed_count+1
}
time = proc.time() - start.time

FN=rep(0,nmethod)
FP=rep(0,nmethod)
mpe=rep(0,nmethod)
variance=rep(0,nmethod)
mean=rep(0,nmethod)
notcon=rep(0,T)
for (i in 1:nmethod) {
  notcon=notcon+result_b[,((i-1)*(p+2)+p+1),b,s1]
}
miss_u=apply(result_b[, ,b,s1],1,sum)

```

```

    index_u=(notcon==0) & (!is.na(miss_u)) & IX[, b, s1]
    for (i in 1:nmethod) {
        FN[i]=1-mean(result_b[index_u,((i-1)*(p+2)+1):((i-
1)*(p+2)+p),b,s1][,signal_id]!=0)
        FP[i]=mean(result_b[index_u,((i-1)*(p+2)+1):((i-
1)*(p+2)+p),b,s1][,-signal_id]!=0)

        temp=t(apply(result_b[index_u,((i-1)*(p+2)+1):((i-
1)*(p+2)+p),b,s1], 1, function(x) x-true))
        mpe[i]=mean(apply(temp,2,function(x) mean(x^2)))
        variance[i]=mean(apply(temp,2,sd))
        mean[i]=mean(temp)
    }

    table_b[count,1]=n
    table_b[count,2]=a[s1]
    table_b[count,3]=beta[b]
    table_b[count,4:(4+nmethod-1)]=FN
    table_b[count,(4+nmethod):(4+2*nmethod-1)]=FP
    table_b[count,(4+2*nmethod):(4+3*nmethod-1)]=FN+FP
    table_b[count,(4+3*nmethod):(4+4*nmethod-1)]=mpe
    table_b[count,(4+4*nmethod):(4+5*nmethod-1)]=variance
    table_b[count,(4+5*nmethod):(4+6*nmethod-1)]=mean
    table_b[count,(4+6*nmethod):(4+6*nmethod+Im-
2)]=apply(result_b[, (nmethod*(p+2)+1):(nmethod*(p+2)+Im-
1),b,s1],2,mean)

    print(count)

    count=count+1

}
}
save.image("~/research/Sim_pQIF_simple_est136.RData")

stopCluster(cl)

```

```
#####
#### 'pQIFmp_scad25_par.R': main function for the proposed method ####
```

```
library(pryr)
pQIFmp1 <- function (X, y, index1, index2, index0, missid, centerx,
scalex, centery=0, lambda=NULL, eps1 = 1e-3, eps2 = 1e-7, eps3=1e-8,
max.iter = 1000, lambda.min=ifelse(n>p,.001,.05), nlam=100,
beta0=NULL, C0=NULL, a=3.7, PCA_m, pat, gamma.ebic=0.5,
alpha1=0.5^(0:12), h1=2^(-(8:30)), ratio=1) {
  dims=dim(X)
  n=dims[1]
  p=dims[2]
  m=dims[3]      # Number of imputations
  #m0=length(index0)      #Number of original patterns
  nm=dim(missid)[1]      #Number of missing sources
  n_pat=length(unique(pat))      #Number of partterns

  XX=X
  YY=y
  vary=rep(1,m)
  for (i in 1:m) {
    vary[i]=var(y[index1[,i],i])
  }

  if (is.null(beta0)) {
    if (!is.null(lambda)) {
      if (lambda==0) {
        if (sum(index1[,1])>p) {
          beta0=lm(YY[index1[,1],1]~XX[index1[,1],,1])$coef[-1]
        } else {
          cvfit <- cv.glmnet(XX[index1[,1],,1], YY[index1[,1],1],
nfoldd=3)
          fit <- cvfit$glmnet.fit
          beta0=t(as.numeric(coef(fit, s=cvfit$lambda.min)))[-1])
        }
      } else {
        model_0=pQIFmp1(X=X, y=y, index1=index1, index2=index2,
index0=index0, missid=missid, centerx=centerx, scalex=scalex,
centery=centery, lambda=0, eps1 = eps1, eps2 = eps2, eps3=eps3,
max.iter = max.iter, lambda.min=lambda.min, nlam=nlam, beta0=beta0,
C0=C0, a=a, PCA_m=PCA_m, pat=pat, gamma.ebic=gamma.ebic,
alpha1=alpha1, h1=h1, ratio = ratio)
        beta0=model_0$beta0
      }
    } else {
      model_0=pQIFmp1(X=X, y=y, index1=index1, index2=index2,
index0=index0, missid=missid, centerx=centerx, scalex=scalex,
centery=centery, lambda=0, eps1 = eps1, eps2 = eps2, eps3=eps3,
max.iter = max.iter, lambda.min=lambda.min, nlam=nlam, beta0=beta0,
C0=C0, a=a, PCA_m=PCA_m, pat=pat, gamma.ebic=gamma.ebic,
alpha1=alpha1, h1=h1, ratio = ratio)
      beta0=model_0$beta0
    }
  }
}
```

```

    }
}

N=sum(index2)
N0=sum(index2[,index0])
numequ=apply(index2,2,sum)
nn=apply(index1,2,sum)
nnn=sqrt(apply(index1,2,sum))
g=rep(0,N)
fq=rep(0,p)
PCA_ind=array(NA,dim=c(n_pat,2,N))
PCA_ind0=matrix(0,n_pat,2)
ind_C=rep(1,n_pat+1)
ind_pat=rep(1,n_pat+1)
U_ind=array(NA,dim=c(n_pat,2,N))

Z2=matrix(0,n,N)
tempequ1=rep(0,m+1)
tempequ1[1]=1
for (s in 1:m) {
  tempequ1[s+1]=tempequ1[s]+numequ[s]
  if(PCA_m[s]==1) {
    PCA_ind[pat[s],1,(PCA_ind0[pat[s],1]+1):(PCA_ind0[pat[s],1]+numequ[s])]
    ]=tempequ1[s]:(tempequ1[s+1]-1)
    PCA_ind0[pat[s],1]=PCA_ind0[pat[s],1]+numequ[s]
  } else if (PCA_m[s]==2) {
    PCA_ind[pat[s],2,(PCA_ind0[pat[s],2]+1):(PCA_ind0[pat[s],2]+numequ[s])]
    ]=tempequ1[s]:(tempequ1[s+1]-1)
    PCA_ind0[pat[s],2]=PCA_ind0[pat[s],2]+numequ[s]
  }
}

size1=matrix(1,N,N)
for (s1 in 1:m) {
  for (s2 in 1:m) {
    n_tmp=sum(index1[,s1]*index1[,s2])
    if (n_tmp*sum(abs(index1[,s1]-index1[,s2]))!=0) {
      size1[tempequ1[s1]:(tempequ1[s1+1]-1),tempequ1[s2]:(tempequ1[s2+1]-1)]=nnn[s1]*nnn[s2]/n_tmp
    }
  }
}

res=matrix(0,n,m)
resvar=rep(1,m)

for (i in 1:n_pat) {
  ind_C[i+1]=ind_C[i]+sum(PCA_ind0[i,])
  ind_pat[i+1]=ind_pat[i]+sum(index1[,min(which(pat==i))])
}

```

```

}

if (is.null(lambda)) {
  for (s in 1:m) {
    res[index1[,s],s]=yy[index1[,s],s]-
XX[index1[,s],,s]%*(rep(0.01,p))
    g[tempequ1[s]:(tempequ1[s+1]-
1)]=t(XX[index1[,s],index2[,s],s])%*(res[index1[,s],s])/(resvar[s]*nn
[s])
    Z2[,tempequ1[s]:(tempequ1[s+1]-1)]=apply(XX[,index2[,s],s], 2,
function(x) x*res[,s])/(resvar[s]*nn[s])
  }

  if (is.null(C0)) {
    #start.time = proc.time()
    C=matrix(0,N,N)
    for (ii in 1:n_pat) {
      C[ind_C[ii]:(ind_C[ii+1]-1),ind_C[ii]:(ind_C[ii+1]-
1)]=t(Z2[ind_pat[ii]:(ind_pat[ii+1]-1),ind_C[ii]:(ind_C[ii+1]-1),
drop=FALSE])%*Z2[ind_pat[ii]:(ind_pat[ii+1]-
1),ind_C[ii]:(ind_C[ii+1]-1), drop=FALSE]
    }
    #time = proc.time() - start.time
    C=C*size1

    fq=Qfirstdev1(h1=h1, beta_pre=rep(0.01,p), XX=XX, yy=yy,
index1=index1, index2=index2, numequ=numequ, tempequ1=tempequ1,
PCA_ind=PCA_ind, PCA_ind0=PCA_ind0, n_pat=n_pat, eps3=eps3, pat=pat,
ind_C=ind_C, ind_pat=ind_pat, ratio = ratio)$fq_star
    print("Get first derivative 0")
    time=proc.time()
    print(time)
    #time = proc.time() - start.time
    lambda.max=max(abs(fq))+0.5

lambda=exp(seq(log(lambda.min*lambda.max),log(lambda.max),len=nlam))
  } else {
    fq=2*t(fg_temp)%*solve(C0,g)
    sq=2*t(fg_temp)%*solve(C0,fg_temp)

    lambda.max=5*max(abs(fq)+abs(sq)%*rep(10,p)))

lambda=exp(seq(log(lambda.min*lambda.max),log(lambda.max),len=nlam))
  }
}

L=length(lambda)
beta=matrix(0,L,p)
beta_pre=beta0
res=matrix(0,n,m)

```

```

qq=rep(0,L)
biq=rep(0,L)
aiq=rep(0,L)
bic=rep(0,L)
ebic1=rep(0,L)
ebic2=rep(0,L)
ebic11=rep(0,L)
ebic21=rep(0,L)
ebicM=rep(0,L)
ebicM1=rep(0,L)
rss=rep(0,L)
bic1=rep(0,L)
rss1=rep(0,L)
beta_out=matrix(0,L,p)
intercept=rep(0,L)
objective=matrix(0,L,2)

notcon=0

ind=rep(TRUE, p)
p1=p

end=FALSE

beta_pre2=beta_pre+0.05

print('Start')          ##### Add print
time=proc.time()
print(time)

for (l in 1:L){
  reset=FALSE
  conjugate=FALSE
  alpha=alpha1
  lalpha=length(alpha)
  ff=rep(0,lalpha)
  # if (l==9) {
  #   print(l)
  # }

  if (l!=1) {
    beta_pre=beta[l-1,]
  }
  fq2=Qfirstdev1(h1=h1, beta_pre=beta_pre2, XX=XX, yy=yy,
index1=index1, index2=index2, numequ=numequ, tempegu1=tempegu1,
PCA_ind=PCA_ind, PCA_ind0=PCA_ind0, n_pat=n_pat, eps3=eps3, pat=pat,
ind_C=ind_C, ind_pat=ind_pat, ratio = ratio)$fq_star
  print("Get first derivative 1")
  time=proc.time()
  print(time)
  pe2=rep(0,p)
  if (lambda[l]!=0) {
    for (j in 1:p) {

```

```

u=abs(beta_pre2[j])
if (u<=lambda[l]+1e-15) {
  if (u==0) {
    if (fq2[j]>lambda[l]) {
      pe2[j]=-lambda[l]
    } else if (fq2[j]<-lambda[l]) {
      pe2[j]=lambda[l]
    } else {
      pe2[j]=-fq2[j]
    }
  } else {
    pe2[j]=lambda[l]
  }
} else if (u<=a*lambda[l]) {
  pe2[j]=(a*lambda[l]-u)/(a-1)
} else {
  pe2[j]=0
}
}
}
firstdev2=fq2+pe2
for (i in 1:max.iter) {
  if (lambda[l]!=0) {
    p1=sum(beta_pre!=0)
    ind=(beta_pre!=0)
  } else {
  }

  #if (sum(apply(missid,1,function(x) sum(ind[x], na.rm =
T))!=0)<nm) {
    if (sum(ind)==0) {
      end=TRUE
      break
      # print(beta[l,])
    }

    for (s in 1:m) {
      res[index1[,s],s]=yy[index1[,s],s]-
XX[index1[,s],,s]%*(as.numeric(beta_pre))
      # resvar[s]=var(res[index1[,s],s])
      g[tempequ1[s]:(tempequ1[s+1]-
1)]=t(XX[index1[,s],index2[,s],s])%*(res[index1[,s],s])/(resvar[s]*nn
[s])
      Z2[,tempequ1[s]:(tempequ1[s+1]-1)]=apply(XX[,index2[,s],s], 2,
function(x) x*res[,s])/(resvar[s]*nn[s])
    }

    if (is.null(C0)) {
      C=matrix(0,N,N)
      for (ii in 1:n_pat) {
        C[ind_C[ii]:(ind_C[ii+1]-1),ind_C[ii]:(ind_C[ii+1]-
1)]=t(Z2[ind_pat[ii]:(ind_pat[ii+1]-1),ind_C[ii]:(ind_C[ii+1]-1),

```

```

drop=FALSE))%*%Z2[ind_pat[ii]:(ind_pat[ii+1]-
1),ind_C[ii]:(ind_C[ii+1]-1), drop=FALSE]
}
#C=t(Z2)%*%Z2
C=C*size1

fq=Qfirstdev1(h1=h1, beta_pre=beta_pre, XX=XX, yy=yy,
index1=index1, index2=index2, numequ=numequ, tempequ1=tempequ1,
PCA_ind=PCA_ind, PCA_ind0=PCA_ind0, n_pat=n_pat, eps3=eps3, pat=pat,
ind_C=ind_C, ind_pat=ind_pat, ratio = ratio)$fq_star
print("Get first derivative 2")
time=proc.time()
print(time)

} else {
fq=2*t(fg_temp)%*%solve(C0,g)
sq=2*t(fg_temp)%*%solve(C0,fg_temp)
}

pe=rep(0,p)
if (lambda[l]!=0) {
for (j in 1:p) {
u=abs(beta_pre[j])
if (u<=lambda[l]+1e-15) {
if (u==0) {
if (fq[j]>lambda[l]) {
pe[j]=-lambda[l]
} else if (fq[j]<-lambda[l]) {
pe[j]=lambda[l]
} else {
pe[j]=-fq[j]
}
} else {
pe[j]=lambda[l]
}
} else if (u<=a*lambda[l]) {
pe[j]=(a*lambda[l]-u)/(a-1)
} else {
pe[j]=0
}
pe[j]=pe[j]*sign(beta_pre[j])
}
}

firstdev=fq+pe
if (conjugate) {
if (firstdev[ind]%*%conj2[ind]>=0) {
reset=TRUE
}
}
if (i==1 | reset) {
reset=FALSE
}

```



```

print('before')
ff = foreach (j = 1:lalpha, .combine = rbind, .packages =
c("MASS", "Matrix"), .export='Qfun1') %dopar% {
  beta_t0=beta_pre[ind]-alpha[j]*firstdev[ind]
  beta_t=beta_pre
  beta_t[ind]=beta_t0

  for (s in 1:m) {
    res[index1[,s],s]=yy[index1[,s],s]-
XX[index1[,s],,s]%*(as.numeric(beta_t))
    g[tempequ1[s]:(tempequ1[s+1]-
1)]=t(XX[index1[,s],index2[,s],s])%*(res[index1[,s],s])/(resvar[s]*nn
[s])
    Z2[,tempequ1[s]:(tempequ1[s+1]-
1)]=apply(XX[,index2[,s],s], 2, function(x)
x*res[,s])/(resvar[s]*nnn[s])
  }
  C=matrix(0,N,N)
  for (ii in 1:n_pat) {
    C[ind_C[ii]:(ind_C[ii+1]-1),ind_C[ii]:(ind_C[ii+1]-
1)]=t(Z2[ind_pat[ii]:(ind_pat[ii+1]-1),ind_C[ii]:(ind_C[ii+1]-1),
drop=FALSE])%*Z2[ind_pat[ii]:(ind_pat[ii+1]-
1),ind_C[ii]:(ind_C[ii+1]-1), drop=FALSE]
  }
  #C=t(Z2)%*Z2
  C=C*size1
  pe_t=0
  for (jj in 1:p) {
    u=abs(beta_t[jj])
    if (u<=lambda[1]) {
      pe_t=pe_t+lambda[1]*u
    } else if (u<=a*lambda[1]) {
      pe_t=pe_t-(u^2-2*a*lambda[1]*u+lambda[1]^2)/(2*(a-1))
    } else {
      pe_t=pe_t+(a+1)*lambda[1]^2/2
    }
  }
  ff_temp=Qfun1(C=C, g=g, PCA_ind=PCA_ind, PCA_ind0=PCA_ind0,
N=N, n_pat=n_pat, eps3 = eps3, index1=index1, pat=pat, res=res,
numequ=numequ, tempequ1=tempequ1, ind_C=ind_C)$q_star+pe_t
  return(ff_temp)
}
print('after')

beta_tmp=beta_pre[ind]-alpha[which.min(ff)]*firstdev[ind]
conj2=-firstdev
} else {
  conjugate=TRUE

threshold=5*sqrt(sum(beta_pre[ind]^2))/(max(alpha)*sqrt(sum(conj2[ind]
^2)))
  if ((conj2[ind]%*(firstdev2[ind]-firstdev[ind]))==0) {

```

```

        gamma=threshold
    } else {
        gamma=max(0,-
(firstdev[ind]**(firstdev[ind]))/(conj2[ind]**(firstdev2[ind]-
firstdev[ind])))
        if (gamma>threshold) {
            gamma=threshold
        }
    }
    conj=-firstdev+gamma*conj2          ##### conjugate direction

    print('before')
    ff = foreach (j = 1:lalpha, .combine = rbind, .packages =
c("MASS", "Matrix"), .export='Qfun1') %dopar% {
        beta_t0=beta_pre[ind]+alpha[j]*conj[ind]
        beta_t=beta_pre
        beta_t[ind]=beta_t0
        for (s in 1:m) {
            res[index1[,s],s]=yy[index1[,s],s]-
XX[index1[,s],,s]**(as.numeric(beta_t))
            # resvar[s]=var(res[index1[,s],s])
            g[tempequ1[s]:(tempequ1[s+1]-
1)]=t(XX[index1[,s],index2[,s],s])**((res[index1[,s],s])/(resvar[s]*nn
[s]))
            Z2[,tempequ1[s]:(tempequ1[s+1]-
1)]=apply(XX[,index2[,s],s], 2, function(x)
x*res[,s])/(resvar[s]*nnn[s])
        }
        C=matrix(0,N,N)
        for (ii in 1:n_pat) {
            C[ind_C[ii]:(ind_C[ii+1]-1),ind_C[ii]:(ind_C[ii+1]-
1)]=t(Z2[ind_pat[ii]:(ind_pat[ii+1]-1),ind_C[ii]:(ind_C[ii+1]-1),
drop=FALSE])**Z2[ind_pat[ii]:(ind_pat[ii+1]-
1),ind_C[ii]:(ind_C[ii+1]-1), drop=FALSE]
        }
        #C=t(Z2)**Z2
        C=C*size1
        pe_t=0
        for (jj in 1:p) {
            u=abs(beta_t[jj])
            if (u<=lambda[1]) {
                pe_t=pe_t+lambda[1]*u
            } else if (u<=a*lambda[1]) {
                pe_t=pe_t-(u^2-2*a*lambda[1]*u+lambda[1]^2)/(2*(a-1))
            } else {
                pe_t=pe_t+(a+1)*lambda[1]^2/2
            }
        }
        ff_temp=Qfun1(C=C, g=g, PCA_ind=PCA_ind, PCA_ind0=PCA_ind0,
N=N, n_pat=n_pat, eps3 = eps3, index1=index1, pat=pat, res=res,
numequ=numequ, tempequ1=tempequ1, ind_C=ind_C)$q_star+pe_t
        return(ff_temp)
    }
}

```

```

    print('after')

    beta_tmp=beta_pre[ind]+alpha[which.min(ff)]*conj[ind]
    conj2=conj
}
print(ff[which.min(ff)])

if (lambda[l]!=0) {
    beta_tmp[abs(beta_tmp)<eps1]=0
    if (sum(abs(beta_tmp)<eps1)>0) {
        reset=TRUE
    }
}
beta[l,ind]=beta_tmp
firstdev2=firstdev
if (i>11) {
    diff1=max(abs(beta[l,]-beta_pre2), abs(beta_pre-beta_pre3))
}
if (i>10) {
    beta_pre3=beta_pre2
}
beta_pre2=beta_pre
beta_pre=beta[l,]
if (diff<eps2) {
    break
} else {
    if (i>11) {
        if (diff1<eps2) {
            alpha=alpha1/max(abs(conj2))
        }
    }
}
time=proc.time()
print(time)
print(mem_used())
}
if (i==max.iter) {
    converge=FALSE
    notcon=notcon+1
    print(diff)
    print(l)
    #break      #test
} else {
    converge=TRUE
}
if (end) {
    break
}
# print(l)
for (s in 1:m) {
    res[index1[,s],s]=yy[index1[,s],s]-
XX[index1[,s],,s]%*(as.numeric(beta[l,]))
    # resvar[s]=var(res[index1[,s],s])
}

```

```

    g[tempequ1[s]:(tempequ1[s+1]-
1)]=t(XX[index1[,s],index2[,s],s])%*(res[index1[,s],s])/(resvar[s]*nn
[s])
    Z2[,tempequ1[s]:(tempequ1[s+1]-1)]=apply(XX[,index2[,s],s], 2,
function(x) x*res[,s])/(resvar[s]*nnn[s])
}

if (is.null(C0)) {
  C=matrix(0,N,N)
  for (ii in 1:n_pat) {
    C[ind_C[ii]:(ind_C[ii+1]-1),ind_C[ii]:(ind_C[ii+1]-
1)]=t(Z2[ind_pat[ii]:(ind_pat[ii+1]-1),ind_C[ii]:(ind_C[ii+1]-1),
drop=FALSE])%*Z2[ind_pat[ii]:(ind_pat[ii+1]-
1),ind_C[ii]:(ind_C[ii+1]-1), drop=FALSE]
  }
  #C=t(Z2)%*Z2
  C=C*size1

  Q0=Qfun1(C=C, g=g, PCA_ind=PCA_ind, PCA_ind0=PCA_ind0, N=N,
n_pat=n_pat, eps3 = eps3, index1=index1, pat=pat, res=res,
numequ=numequ, tempequ1=tempequ1, ind_C=ind_C)
  print("Get Q function value 4")
  time=proc.time()
  print(time)

  TT=Q0$T2[1:(Q0$count-1),, drop=FALSE]%*Q0$T1
  g_star=TT%*g
  C_star=TT%*C%*t(TT)
  invCg_star=solve(C_star,g_star)
} else {
  invCg=solve(C0,g)
}

qq[1]=t(g_star)%*invCg_star
rss[1]=sum(res[,index0]^2)
for (k1 in 1:n_pat) {
  rss1[1]=rss1[1]+sum(res[,pat==k1]^2)/sum(pat==k1)
}
biq[1]=qq[1]+sum(beta[1,]!=0)*log(n)
aiq[1]=qq[1]+sum(beta[1,]!=0)*2
bic[1]=n*log(rss[1])+sum(beta[1,]!=0)*log(n)
bic1[1]=n*log(rss1[1])+sum(beta[1,]!=0)*log(n)

ebic1[1]=n*log(rss[1])+(log(n)+2*gamma.ebic*log(p))*sum(beta[1,]!=0)

ebic2[1]=n*log(rss[1])+log(n)*sum(beta[1,]!=0)+2*gamma.ebic*log(choose
(p,sum(beta[1,]!=0)))

ebic11[1]=n*log(rss1[1])+(log(n)+2*gamma.ebic*log(p))*sum(beta[1,]!=0)

ebic21[1]=n*log(rss1[1])+log(n)*sum(beta[1,]!=0)+2*gamma.ebic*log(choo
se(p,sum(beta[1,]!=0)))
ebicM[1]=n*log(rss[1])+(log(n)+2*log(p))*sum(beta[1,]!=0)

```

```

    ebicM1[l]=n*log(rss1[l])+(log(n)+2*log(p))*sum(beta[l,]!=0)
    objective[l,1]=n*log(rss[l])
    objective[l,2]=log(n)*sum(beta[l,]!=0)
    beta_out[l,]=beta[l,]/scalex
    intercept[l] = centery-crossprod(beta_out[l,],as.numeric(centerx))
  }
  returnlist=list("beta"=beta_out, 'biq'=biq, 'aiq'=aiq, 'bic'=bic,
'bic1'=bic1, "ebic1"=ebic1, "ebic2"=ebic2, "ebic11"=ebic11,
"ebic21"=ebic21, "ebicM"=ebicM, "ebicM1"=ebicM1,
'objective'=objective, 'rss'=rss, 'rss1'=rss1, 'res'=res,
'resvar'=resvar, "lambda"=lambda, "notcon"=notcon,
"intercept"=intercept, "beta0"=beta, "XX"=XX, "yy"=yy,
'centerx'=centerx, 'scalex'=scalex, 'qq'=qq, 'C'=C, 'C0'=C0)#, 'T1'=T1,
'T2'=T2)
  return(returnlist)
}

```

```

Qfun1 <- function (C, g, PCA_ind, PCA_ind0, N, n_pat, eps3=1e-8,
index1, pat, res, numequ, tempequ1, maxeigen=NULL, ind_C) {
  U_ind=array(NA,dim=c(n_pat,2,N))
  U_ind0=matrix(0,n_pat,2)
  T1=diag(1,N,N)
  T2=matrix(0,N,N)

  if (is.null(maxeigen)){
    maxeigen=base::norm((C+t(C))/2, type = '2')
  }

  count=1
  for (k1 in 1:n_pat) {
    id_im=which(pat==k1)
    n_im=length(id_im)
    if (n_im>1) {
      PCA_ind[k1,2,]=NA
      PCA_ind0[k1,2]=0
      for (i in 2:n_im) {
        if (sum(abs(res[,id_im[1]]-res[,id_im[i]]))==0) { ##### If
residuals of other layers are the same as the main layer in the same
group?
          id_im[i]=0
        } else {
          PCA_ind[k1,2,(PCA_ind0[k1,2]+1):(PCA_ind0[k1,2]+numequ[id_im[i]])]=tem
pequ1[id_im[i]]:(tempequ1[id_im[i]+1]-1)
          PCA_ind0[k1,2]=PCA_ind0[k1,2]+numequ[id_im[i]]
        }
      }
    }
  }
  for (k2 in 1:2) {
    if (PCA_ind0[k1,k2]!=0) {
      if (k2==1 | U_ind0[k1,1]==0) {

```

```

        cov_temp=C[PCA_ind[k1,k2,1:PCA_ind0[k1,k2]],
PCA_ind[k1,k2,1:PCA_ind0[k1,k2]], drop=FALSE]
    } else {
        temp1=T2[U_ind[k1,1,1:U_ind0[k1,1]],
PCA_ind[k1,1,1:PCA_ind0[k1,1]], drop=FALSE]
        temp2=solve(temp1%%C[PCA_ind[k1,1,1:PCA_ind0[k1,1]],
PCA_ind[k1,1,1:PCA_ind0[k1,1]], drop=FALSE]%%t(temp1))
        temp3=C[PCA_ind[k1,k2,1:PCA_ind0[k1,k2]],
PCA_ind[k1,1,1:PCA_ind0[k1,1]], drop=FALSE]%%t(temp1)
        T1[PCA_ind[k1,k2,1:PCA_ind0[k1,k2]],
PCA_ind[k1,1,1:PCA_ind0[k1,1]]]=-temp3%%temp2%%temp1

temp_ind=c(PCA_ind[k1,1,1:PCA_ind0[k1,1]],PCA_ind[k1,k2,1:PCA_ind0[k1,
k2]])
        temp4=T1[temp_ind, temp_ind,
drop=FALSE]%%C[temp_ind,temp_ind]%%t(T1[temp_ind,temp_ind])

cov_temp=temp4[(PCA_ind0[k1,1]+1):(PCA_ind0[k1,1]+PCA_ind0[k1,2]),(PCA
_ind0[k1,1]+1):(PCA_ind0[k1,1]+PCA_ind0[k1,2])]
        #cov_temp=C[PCA_ind[k1,k2,1:PCA_ind0[k1,k2]],
PCA_ind[k1,k2,1:PCA_ind0[k1,k2]], drop=FALSE]-temp3%%temp2%%t(temp3)
    }
    eigens=eigen((cov_temp+t(cov_temp))/2)
    values=eigens$values
    if (max(values)>maxeigen) {
        maxeigen=max(values)
    }
    # eigenthreshold=max(eps3, maxeigen*1e-10)
    n_tmp0=sum(index1[,min(which(pat==k1)), drop=FALSE]) ###
Same as pQIFmp_scad20.R, except using the BIC in Cho's paper and ask
number of selected PCA less than n
    nr=n_tmp0*PCA_ind0[k1,k2]
    if (k2==1) {
        number of selected PCA less than n
        tm=n_tmp0-1
    } else {
        tm=n_tmp0-1-U_ind0[k1,1]
    }
    eigenthreshold=max(eps3, maxeigen*1e-10,
sum(values)*log(nr)/(nr))
    rank=rankMatrix(cov_temp)
    if (min(values)>eigenthreshold & rank==min(dim(cov_temp)) &
min(dim(cov_temp))<=tm) {
        U_ind0[k1,k2]=PCA_ind0[k1,k2]
        U_ind[k1,k2,1:U_ind0[k1,k2]]=count:(count+U_ind0[k1,k2]-1)
        #nu_num[count+1]=nu_num[count]+PCA_ind0[k1,k2]
        T2[U_ind[k1,k2,1:U_ind0[k1,k2]],
PCA_ind[k1,k2,1:PCA_ind0[k1,k2]]]=diag(1,PCA_ind0[k1,k2],PCA_ind0[k1,k
2])
    } else if (max(values)>eigenthreshold & rank>0 & tm>0) {
        U_ind0[k1,k2]=max(1,min(apply(index1[,which(pat==k1),
drop=FALSE],2,sum), sum(values>eigenthreshold), rank, tm))
        U_ind[k1,k2,1:U_ind0[k1,k2]]=count:(count+U_ind0[k1,k2]-1)

```

```

        U_temp=as.matrix(eigens$vectors[,1:U_ind0[k1,k2]])
        T2[U_ind[k1,k2,1:U_ind0[k1,k2]],
PCA_ind[k1,k2,1:PCA_ind0[k1,k2]]]=t(U_temp%%diag(sign(U_temp[dim(U_temp)[1],]),
length(sign(U_temp[dim(U_temp)[1],])),
length(sign(U_temp[dim(U_temp)[1],]))))
    }
    count=count+U_ind0[k1,k2]
  }
}

ind_tT=rep(1,n_pat+1)
#ind_Cstar=rep(1,n_pat+1)
tempT=matrix(0,(count-1),N)
C_star=matrix(0,(count-1),(count-1))
for (ii in 1:n_pat) {
  ind_tT[ii+1]=ind_tT[ii]+sum(U_ind0[ii,])
  #ind_Cstar[ii+1]=ind_Cstar[ii]+sum(PCA_ind0[ii,])
  tempT[ind_tT[ii]:(ind_tT[ii+1]-1),ind_C[ii]:(ind_C[ii+1]-1)]=T2[ind_tT[ii]:(ind_tT[ii+1]-1),ind_C[ii]:(ind_C[ii+1]-1),
drop=FALSE]%%T1[ind_C[ii]:(ind_C[ii+1]-1),ind_C[ii]:(ind_C[ii+1]-1),
drop=FALSE]
  C_star[ind_tT[ii]:(ind_tT[ii+1]-1),ind_tT[ii]:(ind_tT[ii+1]-1)]=tempT[ind_tT[ii]:(ind_tT[ii+1]-1),ind_C[ii]:(ind_C[ii+1]-1),
drop=FALSE]%%C[ind_C[ii]:(ind_C[ii+1]-1),ind_C[ii]:(ind_C[ii+1]-1),
drop=FALSE]%%t(tempT[ind_tT[ii]:(ind_tT[ii+1]-1),ind_C[ii]:(ind_C[ii+1]-1), drop=FALSE])
}
q_star=t(g_star)%%solve(C_star,g_star)

# time5 = proc.time() - start.time
returnlist=list('q_star'=q_star, 'C_star'=C_star, 'g_star'=g_star,
'T1'=T1, 'T2'=T2, 'count'=count, 'tempT'=tempT)
return(returnlist)
}

```

```

Qfirstdev1 <- function (h1=2^(-(8:30)), beta_pre, XX, yy, index1,
index2, numegu, tempegu1, PCA_ind, PCA_ind0, n_pat, eps3, pat, ind_C,
ind_pat, ratio) {
  dims=dim(XX)
  n=dims[1]
  p=dims[2]
  m=dims[3]
  res=matrix(0,n,m)
  res1=matrix(0,n,m)
  res2=matrix(0,n,m)
  resvar=rep(1,m)
  resvar1=rep(1,m)
  resvar2=rep(1,m)
  N=sum(index2)
  Z2=matrix(0,n,N)
  Z21=matrix(0,n,N)

```

```

Z22=matrix(0,n,N)
g=rep(0,N)
g1=rep(0,N)
g2=rep(0,N)
nn=apply(index1,2,sum)
nnn=sqrt(apply(index1,2,sum))

for (s in 1:m) {
  res[index1[,s],s]=yy[index1[,s],s]-
XX[index1[,s],,s]**(as.numeric(beta_pre))
  # resvar1[s]=var(res1[index1[,s],s])
  g[tempequil[s]:(tempequil[s+1]-
1)]=t(XX[index1[,s],index2[,s],s])**((res[index1[,s],s])/(resvar[s]*nn
[s]))
  Z2[,tempequil[s]:(tempequil[s+1]-1)]=apply(XX[,index2[,s],s], 2,
function(x) x*res[,s])/(resvar[s]*nnn[s])
}
C=matrix(0,N,N)
for (ii in 1:n_pat) {
  C[ind_C[ii]:(ind_C[ii+1]-1),ind_C[ii]:(ind_C[ii+1]-
1)]=t(Z2[ind_pat[ii]:(ind_pat[ii+1]-1),ind_C[ii]:(ind_C[ii+1]-1),
drop=FALSE])**Z2[ind_pat[ii]:(ind_pat[ii+1]-
1),ind_C[ii]:(ind_C[ii+1]-1), drop=FALSE]
}
#C=t(Z2)**Z2
maxeigen=base::norm((C+t(C))/2, type = '2')
#print(maxeigen)

qfun=Qfun1(C=C, g=g, PCA_ind=PCA_ind, PCA_ind0=PCA_ind0, N=N,
n_pat=n_pat, eps3 = eps3, index1=index1, pat=pat, res=res,
numequ=numequ, tempequil=tempequil, maxeigen=maxeigen, ind_C=ind_C)
tempT=qfun$tempT
C_star=qfun$C_star
S_C_star=solve(C_star)

#fq_star=rep(0,p)
# start.time = proc.time()
result = foreach (j1 = 1:p, .combine = rbind, .packages = c("MASS",
"Matrix"), .export='Qfun1') %dopar% {
  h=h1
  if (abs(beta_pre[j1])<1e-2 & abs(beta_pre[j1])>0) {
    h=h1*max(1e-2, abs(beta_pre[j1]))
  }
  temp_fq=0
  temp_sq=0
  temp_diff1=Inf
  temp_diff2=Inf
  for (hh in 1:length(h)) {
    # start.time = proc.time()
    beta_temp1=beta_pre
    beta_temp2=beta_pre

```



```

    beta_temp1[j1]=beta_pre[j1]+h[hh]
    beta_temp2[j1]=beta_pre[j1]-h[hh]

    for (s in 1:m) {
        res1[index1[,s],s]=yy[index1[,s],s]-
XX[index1[,s],,s]**(as.numeric(beta_temp1))
        g1[tempequ1[s]:(tempequ1[s+1]-
1)]=t(XX[index1[,s],index2[,s],s])**((res1[index1[,s],s])/((resvar1[s]*
nn[s]))
        res2[index1[,s],s]=yy[index1[,s],s]-
XX[index1[,s],,s]**(as.numeric(beta_temp2))
        g2[tempequ1[s]:(tempequ1[s+1]-
1)]=t(XX[index1[,s],index2[,s],s])**((res2[index1[,s],s])/((resvar2[s]*
nn[s]))
    }

    g_star1=tempT**g1
    g_star2=tempT**g2
    q_star1=t(g_star1)**S_C_star**g_star1
    q_star2=t(g_star2)**S_C_star**g_star2

    fq_star_par=(q_star1-q_star2)/(2*h[hh])
    #print(sq_star[j1,j1])
    if (hh==1) {
        fq_pre=fq_star_par
    } else {
        if (fq_diff<temp_diff1) {
            temp_diff1=fq_diff
            temp_fq=fq_star_par
        }
        if (fq_diff<1e-3) {
            break
        } else {
            fq_pre=fq_star_par
        }
    }
    # time3 = proc.time() - start.time
}
if (fq_diff>1e-3) {
    fq_star_par=temp_fq
    # print(paste(j1,l,i))
}
# print(hh)
return(c(fq_star_par,q_star1,q_star2))
}
# time = proc.time() - start.time
returnlist=list('fq_star'=result[,1]+rnorm(p,0,0.1),
'q_star1'=result[,2], 'q_star2'=result[,3])
return(returnlist)
}

```

```
##### 'imputeglm.predict.R' #####

library(MASS)
library(glmnetcr)
imputeglm.predict <- function (X, ind_y, ind_x=-ind_y, miss, newdata,
family="gaussian") {
  ny=length(ind_y)
  nx=length(X[,ind_x])+1
  B=matrix(0,nx,ny)
  PRED=matrix(0,dim(newdata)[1],ny)
  for (l in 1:ny) {
    ind_obs=!miss[,ind_y[l]]

    x.t=X[ind_obs,ind_x]
    y.t=X[ind_obs,ind_y[l]]
    x.train=x.t[apply(miss[ind_obs,ind_x],1,sum)==0,]
    y.train=y.t[apply(miss[ind_obs,ind_x],1,sum)==0]
    data0=data.frame(y.train, x.train)
    newx=as.data.frame(newdata)
    colnames(newx)=colnames(data0)[-1]
    if (family=="ordinal") {
      data0[,1]=as.factor(data0[,1])
      if (dim(x.train)[1]>dim(x.train)[2]) {
        fit=polr(y.train~., data = data0)
        coeff=c(0,fit$coef) ##### The intercept
may be wrong
        pred=as.numeric(as.character(predict(fit, type = 'class',
newdata=newx)))
      } else {
        fit <- glmnetcr(data0[,-1], data0[,1], maxit=500)
        select = select.glmnetcr(fit)
        coeff=fit$beta[1:nx,select] ##### The intercept
may be wrong
        pred=as.numeric(fitted(fit, newx=newx, s=select)$class)
      }
    } else if (family=="binomial") {
      data0[,1]=as.factor(data0[,1])
      if (dim(x.train)[1]>dim(x.train)[2]) {
        fit=glm(y.train~., family=family, data=data0)
        coeff=fit$coef
        prob=predict(fit,newdata=newx, type = 'response')
        pred=rep(as.numeric(levels(data0$y.train)[1]),dim(newdata)[1])
        pred[prob>0.5]=as.numeric(levels(data0$y.train)[2])
      } else {
        fit=glmnet(x.train, y.train, family=family)
        k <- fit$df
        n <- fit$nobs
        select=which.min(log(n)*k+deviance(fit))
        coeff=t(as.numeric(coef(fit, s=select)))
      }
    }
  }
}
```

```

        pred=as.numeric(predict(fit, newx=newdata, s=select, type =
'class'))
    }
    } else {
        if (dim(x.train)[1]>dim(x.train)[2]) {
            fit=glm(y.train~., family=family, data=data0)
            coeff=fit$coef
            pred=predict(fit,newdata=newx)
        } else {
            cvfit <- cv.glmnet(x.train, y.train, nfolds=3, family=family)
            fit <- cvfit$glmnet.fit
            coeff=t(as.numeric(coef(fit, s=cvfit$lambda.min)))
            pred=predict(fit, newx=newdata, s=cvfit$lambda.min)
        }
    }
    B[,1]=coeff
    PRED[,1]=pred
}
returnlist=list("B"=B, "PRED"=PRED)
return(returnlist)
}

```

```

##### 'mySCAD5.R' #####
mySCAD <- function (X, y, lambda=NULL, a=3.7, eps = 0.001,
lambda.min=ifelse(n>p,.001,.05), max.iter = 1000, nlam=100,
standardize=TRUE, gamma.ebic=0.5) { #y should be centered
  n = nrow(X)
  p = ncol(X)
  center=rep(0,p)
  scale=rep(1,p)
  XX=X
  v=rep(n,p) #inner product of columns of XX
  if (standardize==TRUE) {
    for (i in 1:p) {
      center[i]=mean(X[,i])
      Xtmp=X[,i]-center[i]
      if (sqrt(sum((Xtmp)^2)/n)>0) {
        scale[i]=sqrt(sum((Xtmp)^2)/n)
      }
      XX[,i]=Xtmp/scale[i]
    }
  } else {
    for (i in 1:p) {
      center[i]=mean(X[,i])
      XX[,i]=X[,i]-center[i]
      v[i]=crossprod(XX[,i],XX[,i])
    }
  }
}

```

```

yy=y-mean(y)
m=n          #I think packages 'plus' uses n
if (a<=(m/min(v)+1)) {
  print(paste("Error: a should be larger than ", m/min(v)+1))
  a=m/min(v)+1.05      #plus 0.05, change a
}
user=TRUE
if (is.null(lambda)) {
  fit.lam <- glm(yy ~ 1, family = "gaussian")
  lambda.max=max(abs(crossprod(XX,fit.lam$residuals)/m))

lambda=exp(seq(log(lambda.max),log(lambda.min*lambda.max),len=nlam))
  user=FALSE
}
L=length(lambda)
beta=matrix(0,L,p)
beta_out=matrix(0,L,p)
intercept=rep(0,L)
rss=rep(0,L)      #residual sum of squares
gcv=rep(0,L)
bic=rep(0,L)
ebic1=rep(0,L)
ebic2=rep(0,L)
ebicM=rep(0,L)      ##### With the largest gamma.ebic
beta_pre=rep(0,p)
e=rep(0,p)
res=yy
notcon=0

if (user) {
  lstart=1
} else {
  rss[1]=crossprod(yy,yy)
  gcv[1]=rss[1]/(n*(1-sum(beta[1,]!=0)/n)^2)      #new formula in
paper???
  bic[1]=n*log(rss[1])+log(n)*sum(beta[1,]!=0)      #cv??

ebic1[1]=n*log(rss[1])+(log(n)+2*gamma.ebic*log(p))*sum(beta[1,]!=0)

ebic2[1]=n*log(rss[1])+log(n)*sum(beta[1,]!=0)+2*gamma.ebic*log(choose
(p,sum(beta[1,]!=0)))
  ebicM[1]=n*log(rss[1])+(log(n)+2*log(p))*sum(beta[1,]!=0)
##### With the largest gamma.ebic
  beta_out[1,]=beta[1,]/scale
  intercept[1] = mean(y)-crossprod(center, beta_out[1,])
  lstart=2
}
for (l in lstart:L) {
  if (l!=1) {
    beta_pre=beta[l-1,]
  }
  i=1
  while (i<max.iter) {

```

```

while (i<max.iter) {
  i=i+1
  #print(i)
  tmp=0
  for (j in 1:p) {
    if (e[j]!=0){
      u=crossprod(XX[,j],res)/v[j]+beta_pre[j]      #least
squares estimator
      s=0
      if (u>0) s=1
      if (u<0) s=-1
      lamscaled=lambda[l]*m/v[j]
      if (abs(u)<=(lamscaled+1e-15)) {
        beta[l,j]=0
      } else if (abs(u)<=(lambda[l]+lamscaled)) {
        beta[l,j]=s*(abs(u)-lamscaled)
      } else if (abs(u)<=a*lambda[l]) {
        beta[l,j]=s*(abs(u)-a*lamscaled/(a-1))/(1-m/((a-
1)*v[j]))
      } else {
        beta[l,j]=u
      }
      shift=beta[l,j]-beta_pre[j]
      if (shift!=0) {
        res=res-shift*XX[,j]
        if (abs(shift/beta_pre[j])>tmp)
tmp=abs(shift/beta_pre[j])
      }
    }
  }
  beta_pre=beta[l,]
  if (tmp<eps) {
    break
  }
}
violations=0;
for (j in 1:p)
{
  if (e[j]==0)
  {
    u=crossprod(XX[,j],res)/v[j]+beta_pre[j]      #least squares
estimator
    s=0
    if (u>0) s=1
    if (u<0) s=-1
    lamscaled=lambda[l]*m/v[j]
    if (abs(u)<=(lamscaled+1e-15)) {
      beta[l,j]=0
    } else if (abs(u)<=(lambda[l]+lamscaled)) {
      beta[l,j]=s*(abs(u)-lamscaled)
    } else if (abs(u)<=a*lambda[l]) {
      beta[l,j]=s*(abs(u)-a*lamscaled/(a-1))/(1-m/((a-1)*v[j]))
    } else {

```

```

        beta[l,j]=u
      }

      if (beta[l,j]!=0)
      {
        e[j]=1
        res=res-beta[l,j]*XX[,j]
        beta_pre[j]=beta[l,j]
        violations=violations+1
      }
    }
  }
  if (violations==0) break;
}
if (i==max.iter) {
  converge=FALSE
  notcon=notcon+1
  print(l)
} else {
  converge=TRUE
}
rss[l]=crossprod(res,res)
gcv[l]=rss[l]/(n*(1-sum(beta[l,j]!=0)/n)^2)      #new formula in
paper???
bic[l]=n*log(rss[l])+log(n)*sum(beta[l,j]!=0)      #cv??

ebic1[l]=n*log(rss[l])+(log(n)+2*gamma.ebic*log(p))*sum(beta[l,j]!=0)

ebic2[l]=n*log(rss[l])+log(n)*sum(beta[l,j]!=0)+2*gamma.ebic*log(choose
(p,sum(beta[l,j]!=0)))
ebicM[l]=n*log(rss[l])+(log(n)+2*log(p))*sum(beta[l,j]!=0)
##### With the largest gamma.ebic
beta_out[l,j]=beta[l,j]/scale
intercept[l] = mean(y)-crossprod(center, beta_out[l,j])
}
returnlist=list("beta"=beta_out, "bic"=bic, "ebic1"=ebic1,
"ebic2"=ebic2, "ebicM"=ebicM, "gcv"=gcv, "rss"=rss, "lambda"=lambda,
"notcon"=notcon, "intercept"=intercept, "beta0"=beta, "XX"=XX,
"YY"=yy)
return(returnlist)
}

```

```

##### 'DISCOM.R' #####
compute.xtx<-function(x,robust=0,k_value=1.5) # robust=1 for huber
estimate, k_value is used in huber function
{
  p=ncol(x)
  cov.matrix=matrix(NA,p,p)
  for(i in 1:p)
  {
    for(j in 1:p){

```

```

        index=which((!is.na(x[,i]))&(!is.na(x[,j])))
        x1=x[index,i]
        x2=x[index,j]
        if(robust==0){cov.matrix[i,j]=sum((x1-mean(x1))*(x2-
mean(x2)))/(length(index)-1)}
        else {cov.matrix[i,j]=huberM((x1-mean(x1))*(x2-
mean(x2)),k=k_value*sqrt(length(index)/log(p)))$mu}
    }
}
cov.matrix
}

compute.xty<-function(x,y,robust=0,k_value=1.5)# robust=1 for huber
estimate, k_value is used in huber function
{
  p=ncol(x)
  cov.vector=rep(NA,p)
  for(i in 1:p){
    index=which((!is.na(x[,i])))
    x1=x[index,i]
    x2=y[index]
    if(robust==0){cov.vector[i]=sum((x1-mean(x1))*(x2-
mean(x2)))/(length(index)-1)}
    else {cov.vector[i]=huberM((x1-mean(x1))*(x2-
mean(x2)),k=k_value*sqrt(length(index)/log(p)))$mu}
  }
  cov.vector
}

compute.mean<-function(x)
{
  p=ncol(x)
  means=rep(NA,p)
  for(i in 1:p){means[i]=mean(x[,i],na.rm=T)}
  means
}

compute.sd<-function(x)
{
  p=ncol(x)
  sds=rep(NA,p)
  for(i in 1:p){sds[i]=sd(x[,i],na.rm=T)}
  sds
}

```
